# Supplementary material for: Synthesis of α,α-diaryl nitriles by radical nucleophilic substitution
Source: Royal Society of Chemistry journal article supplement (doi:10.1039/c1nj20699k), 2011-11-28

# Synthesis of $\alpha,\alpha$ -diaryl nitriles by radical nucleophilic substitution

Tomas C. Tempesti, Adriana B. Pierini, Maria T. Baumgartner\*

## Supporting information

|                                                       |     |
|-------------------------------------------------------|-----|
| $^1\text{H}$ NMR and $^{13}\text{C}$ NMR of <b>3a</b> | S2  |
| $^1\text{H}$ NMR and $^{13}\text{C}$ NMR of <b>3b</b> | S3  |
| $^1\text{H}$ NMR and $^{13}\text{C}$ NMR of <b>3c</b> | S4  |
| $^1\text{H}$ NMR and $^{13}\text{C}$ NMR of <b>3d</b> | S5  |
| $^1\text{H}$ NMR and $^{13}\text{C}$ NMR of <b>4d</b> | S6  |
| $^1\text{H}$ NMR and $^{13}\text{C}$ NMR of <b>3e</b> | S7  |
| $^1\text{H}$ NMR and $^{13}\text{C}$ NMR of <b>4e</b> | S8  |
| $^1\text{H}$ NMR and $^{13}\text{C}$ NMR of <b>3f</b> | S9  |
| $^1\text{H}$ NMR and $^{13}\text{C}$ NMR of <b>3f</b> | S10 |
| $^1\text{H}$ NMR and $^{13}\text{C}$ NMR of <b>3g</b> | S11 |

*$\alpha$ -(2-methoxyphenyl)-2-naphthylacetonitrile(3a)*

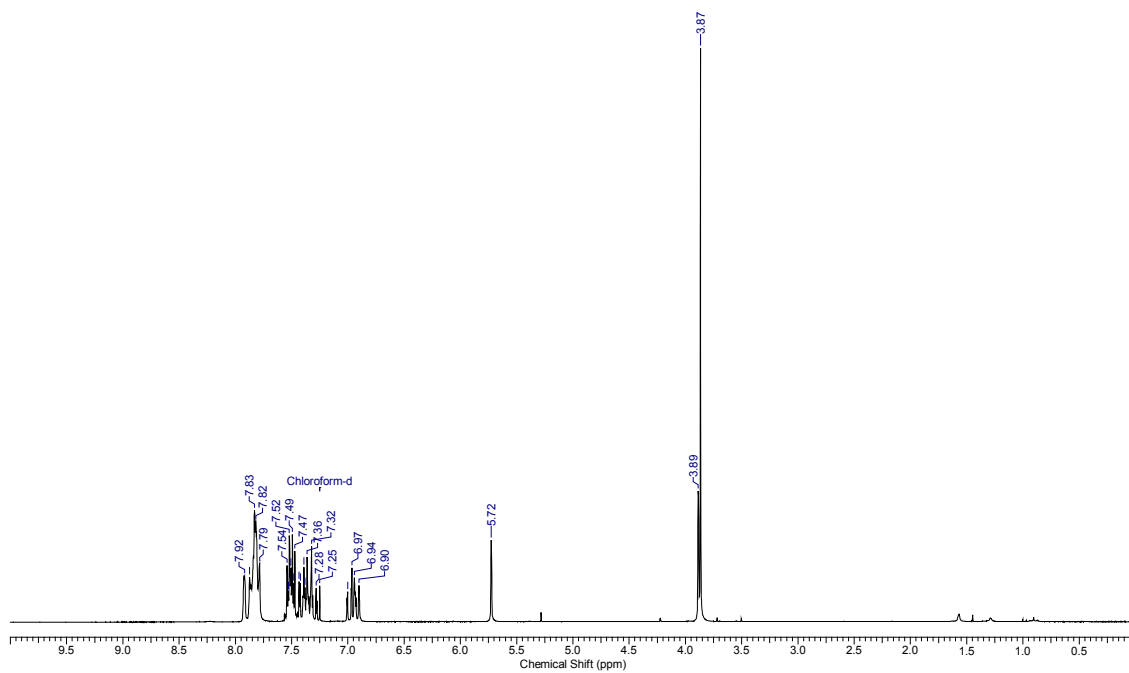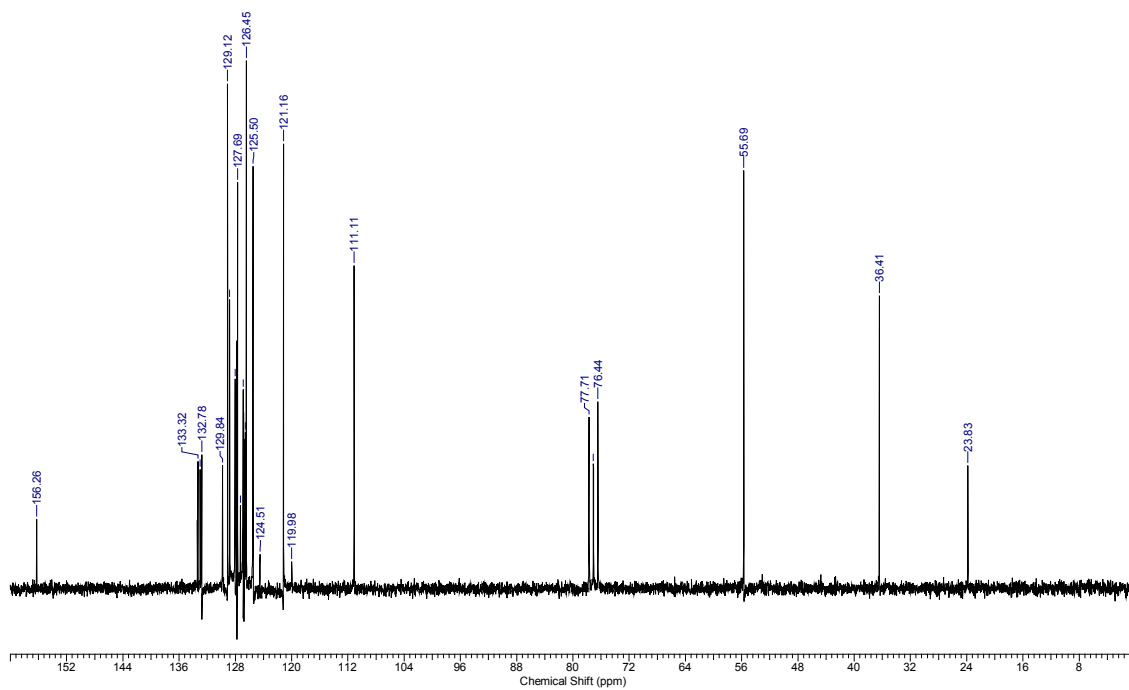

*$\alpha$ -(2-methoxynaphthyl)-2-naphthylacetonitrile(3b)*

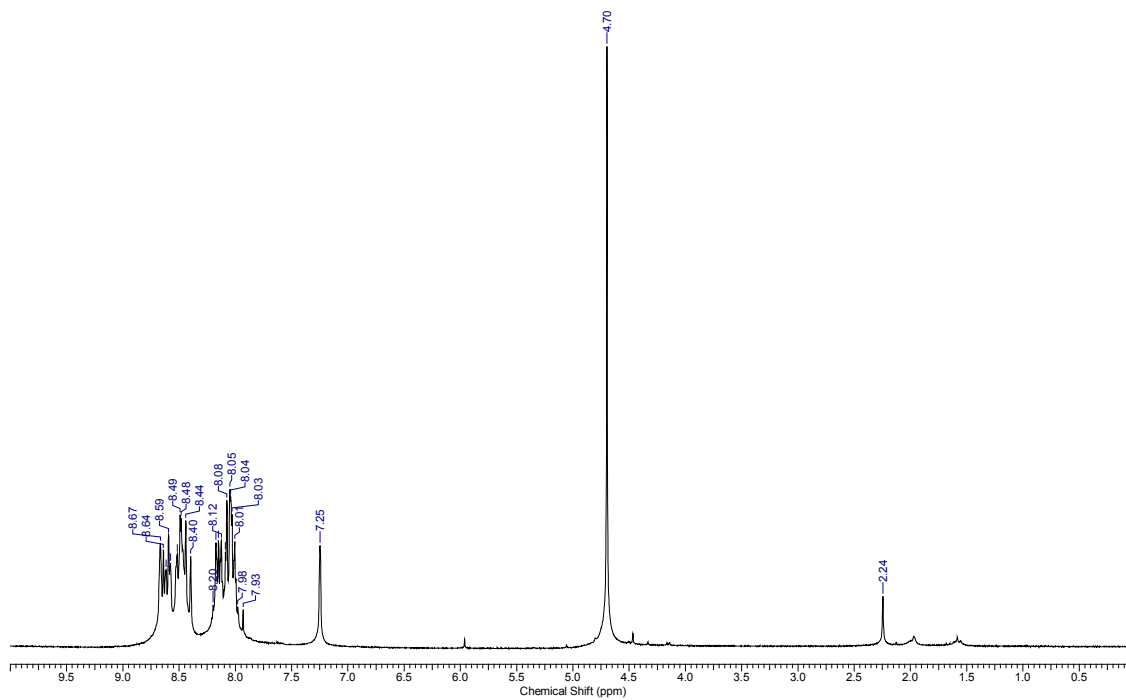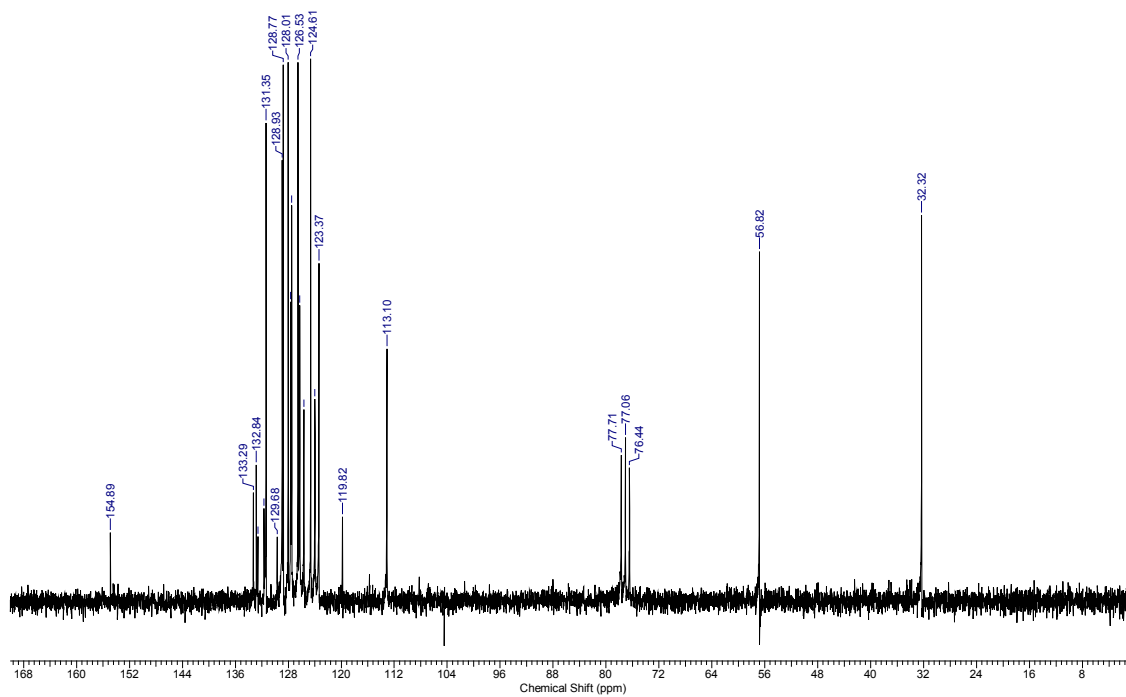

*$\alpha$ -(9-anthracenyl)-2-naphthylacetonitrile(3c)*

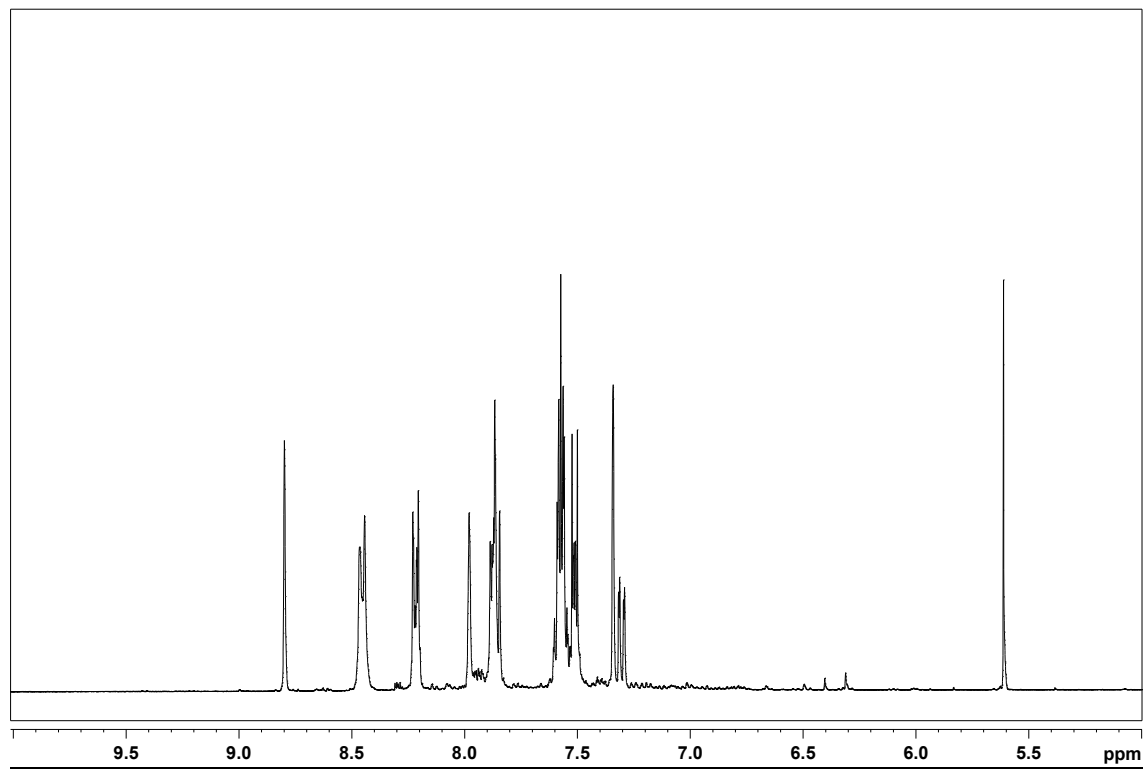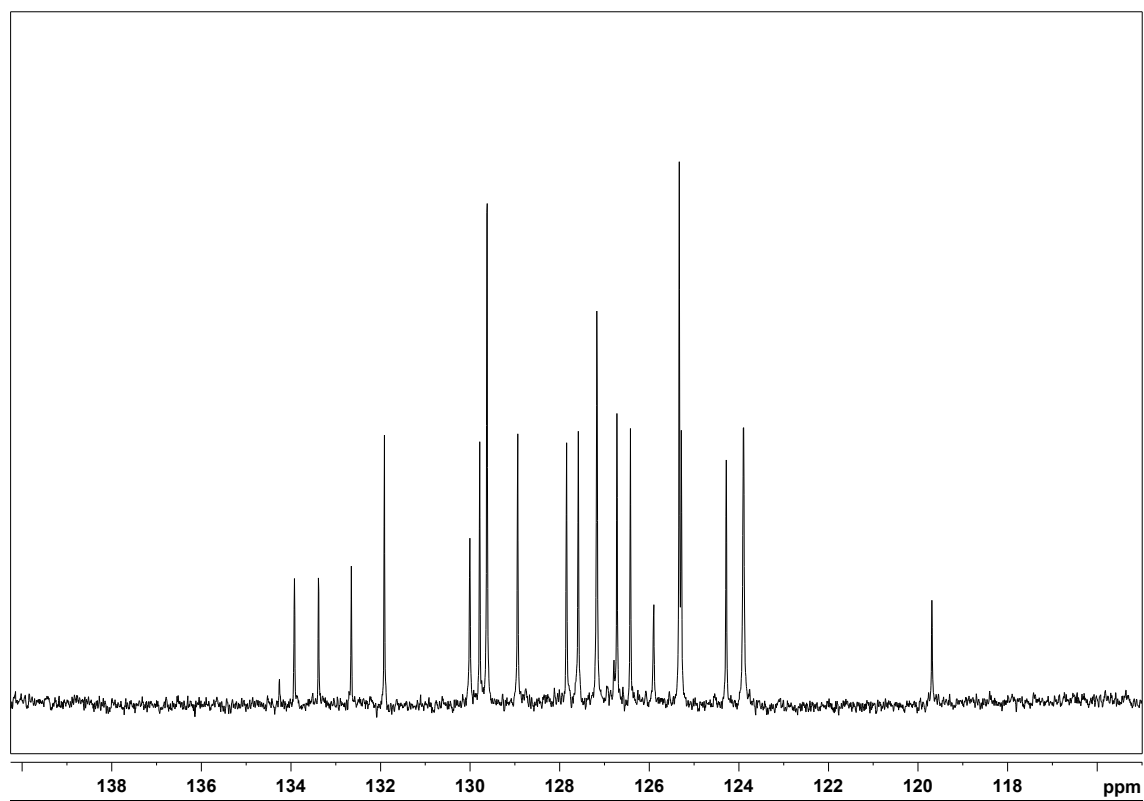

*$\alpha$ -(4-methoxyphenyl)-2-naphthylacetonitrile(3d)*

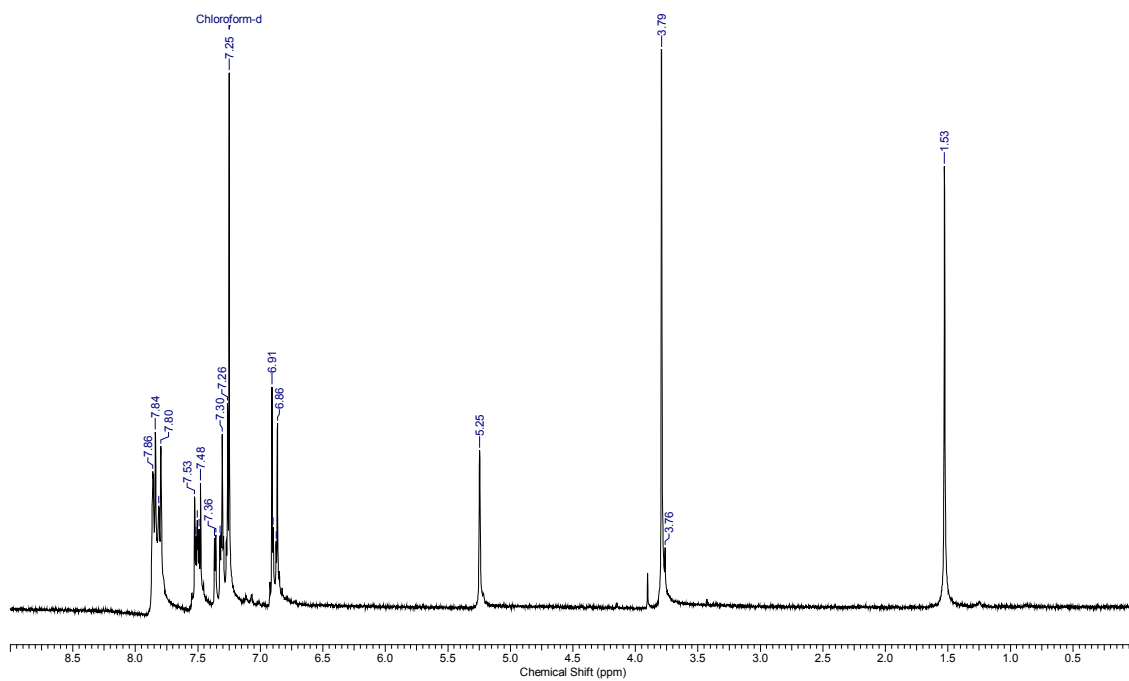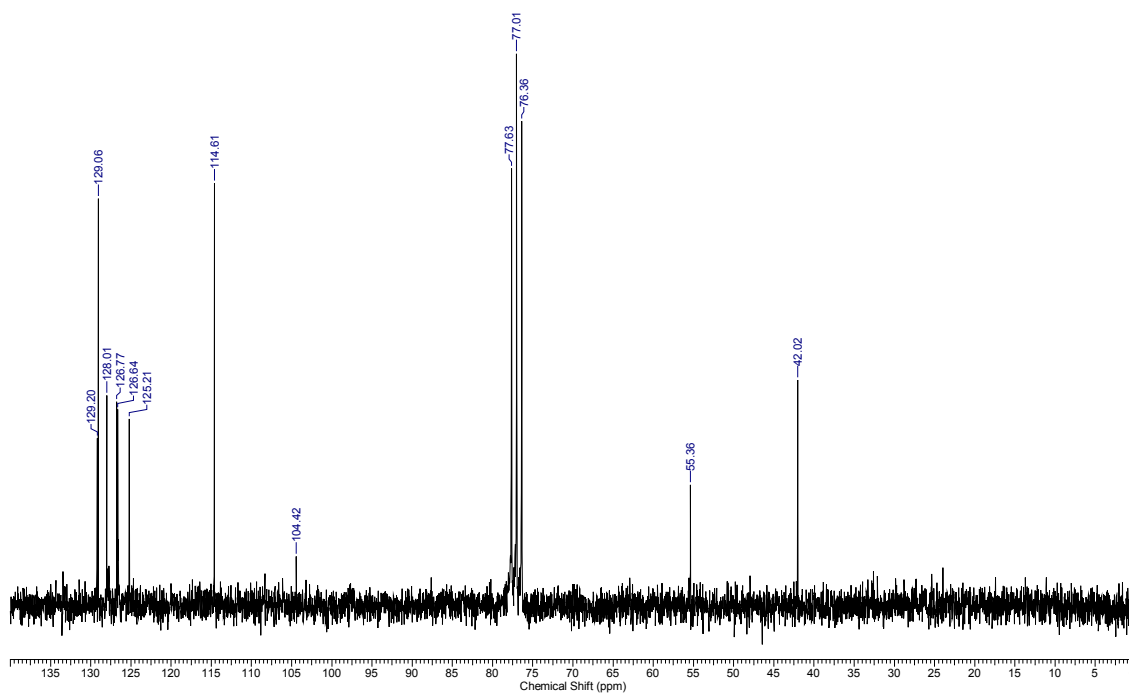

*1-(4-methoxyphenyl)-2-naphthylacetonitrile(4d)*

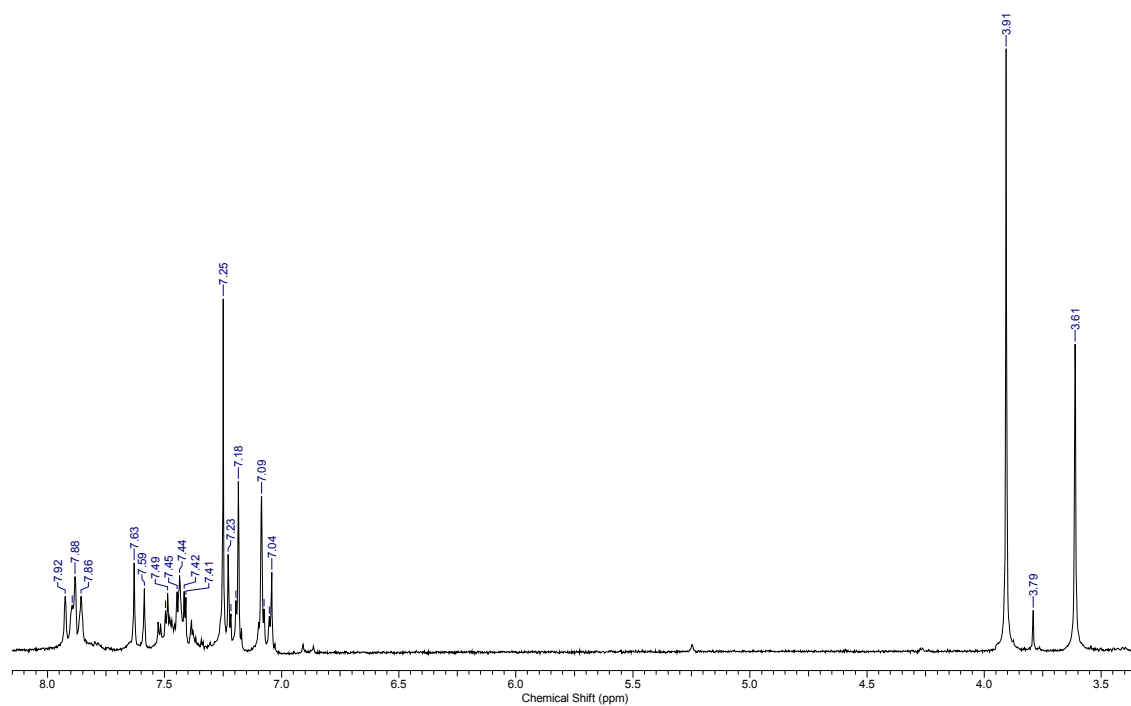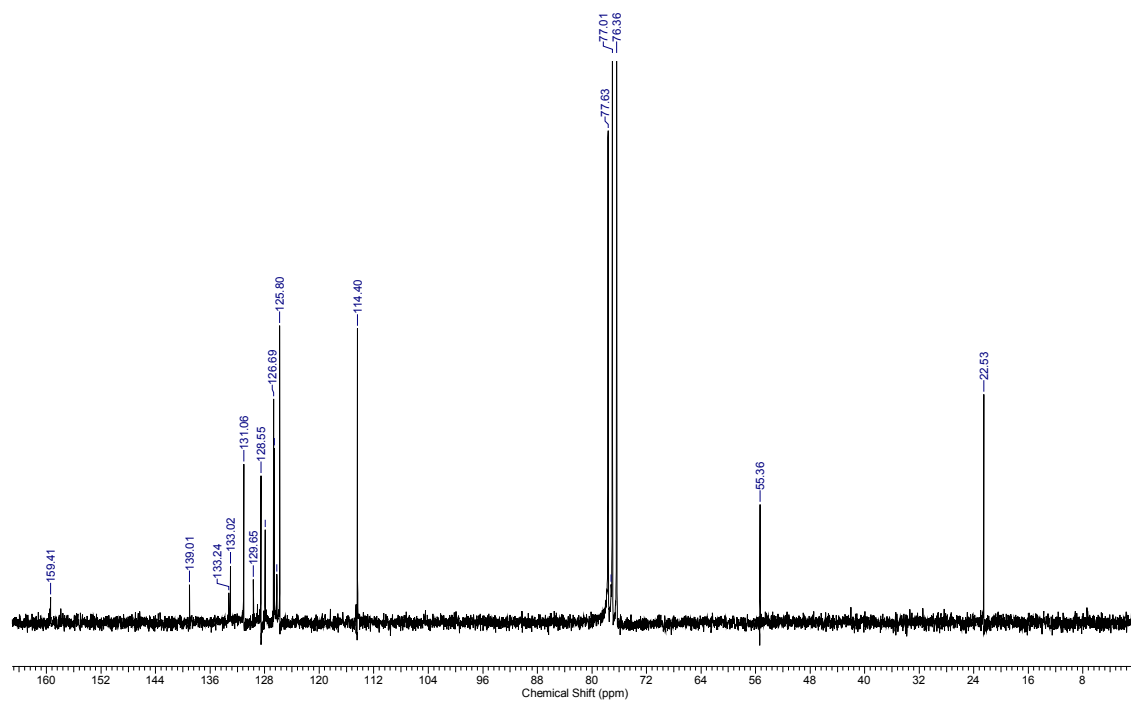

*$\alpha$ -(1-naphthyl)-2-naphthylacetonitrile (3e)*

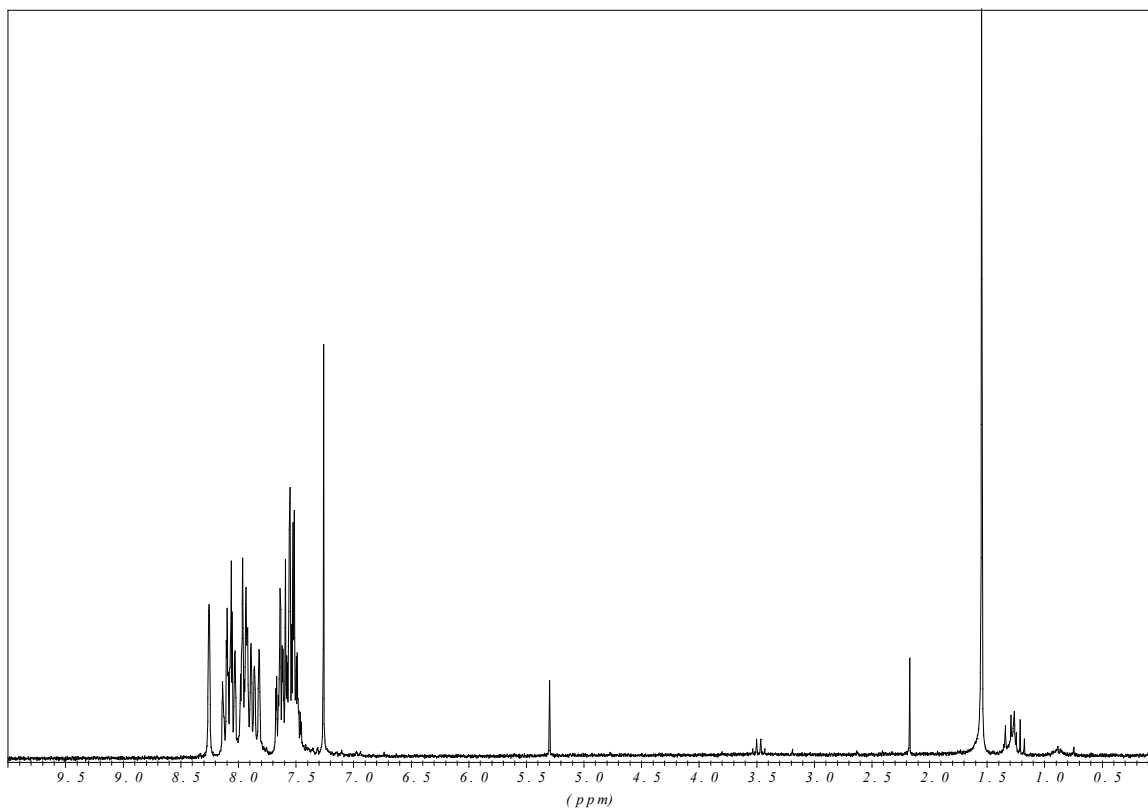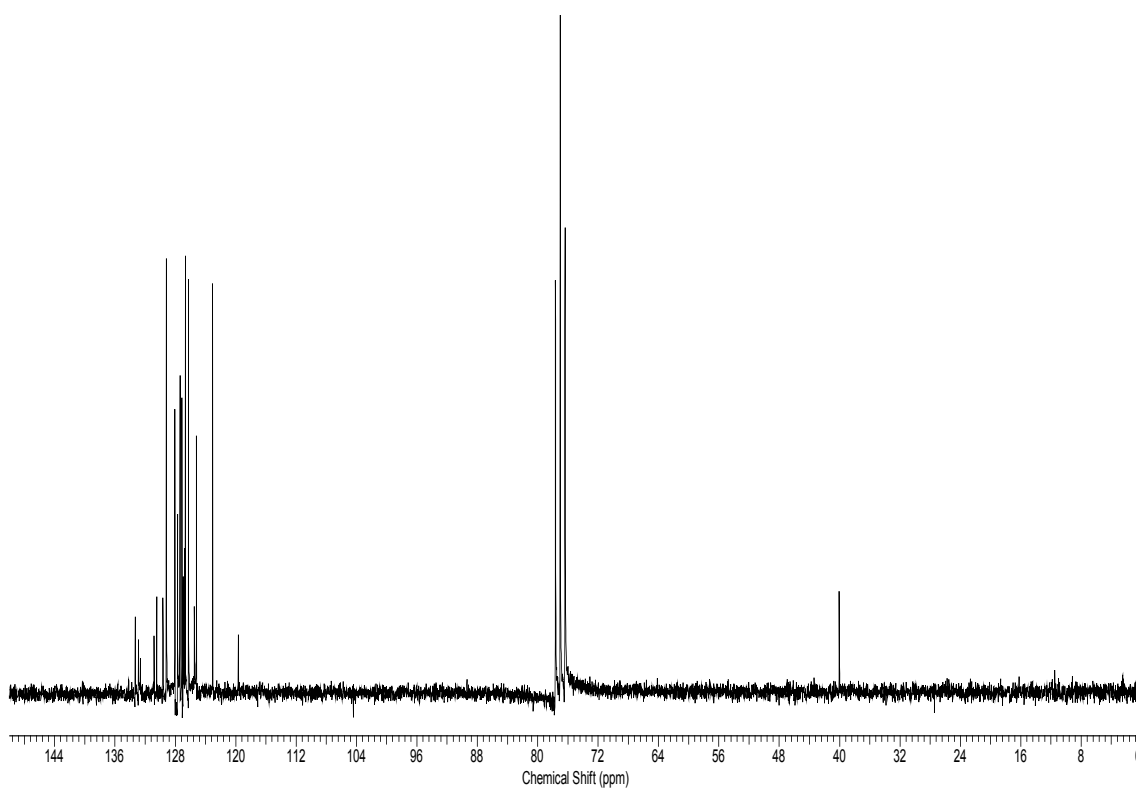

*1-(1-naphthyl)-2-naphthylacetonitrile(4e)*

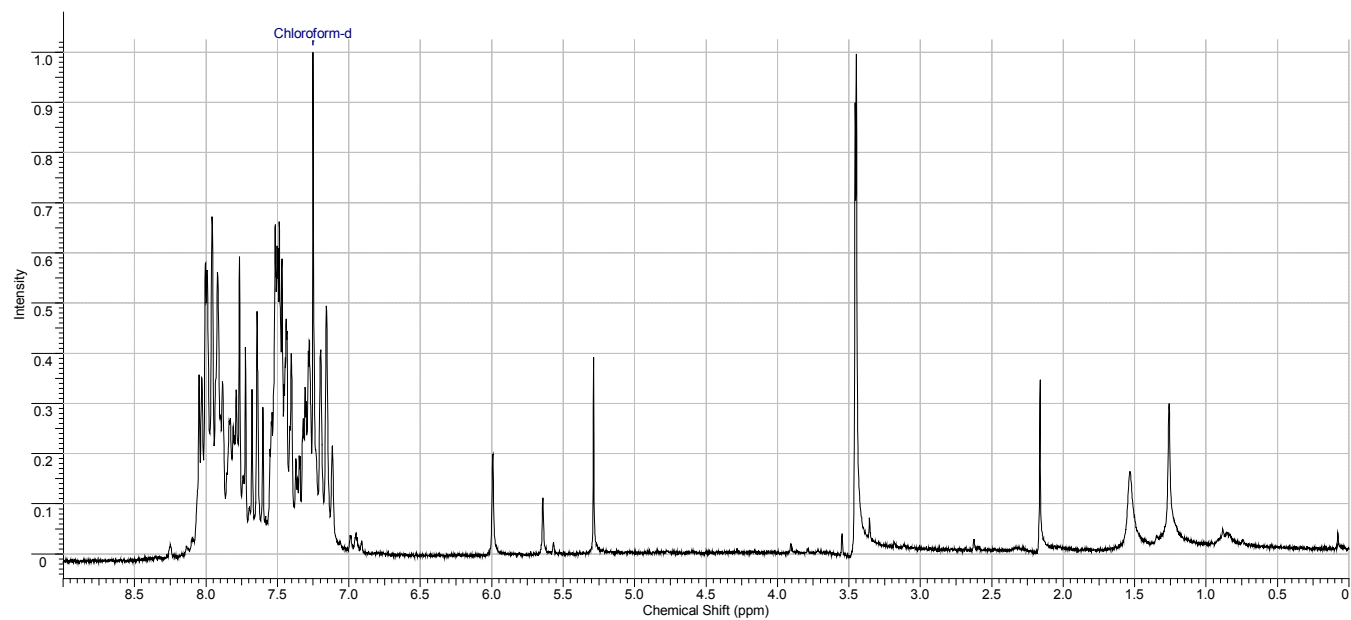



*$\alpha$ -(9-phenanthryl)-2-naphthylacetonitrile (3f)*

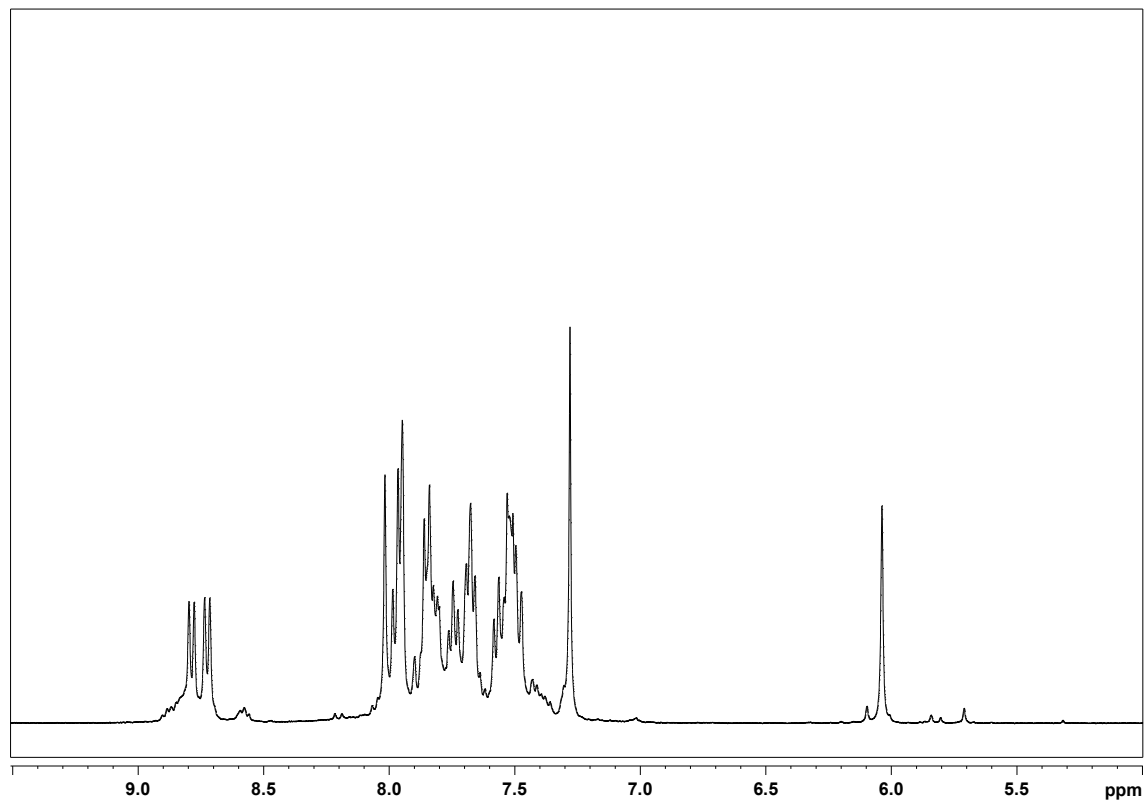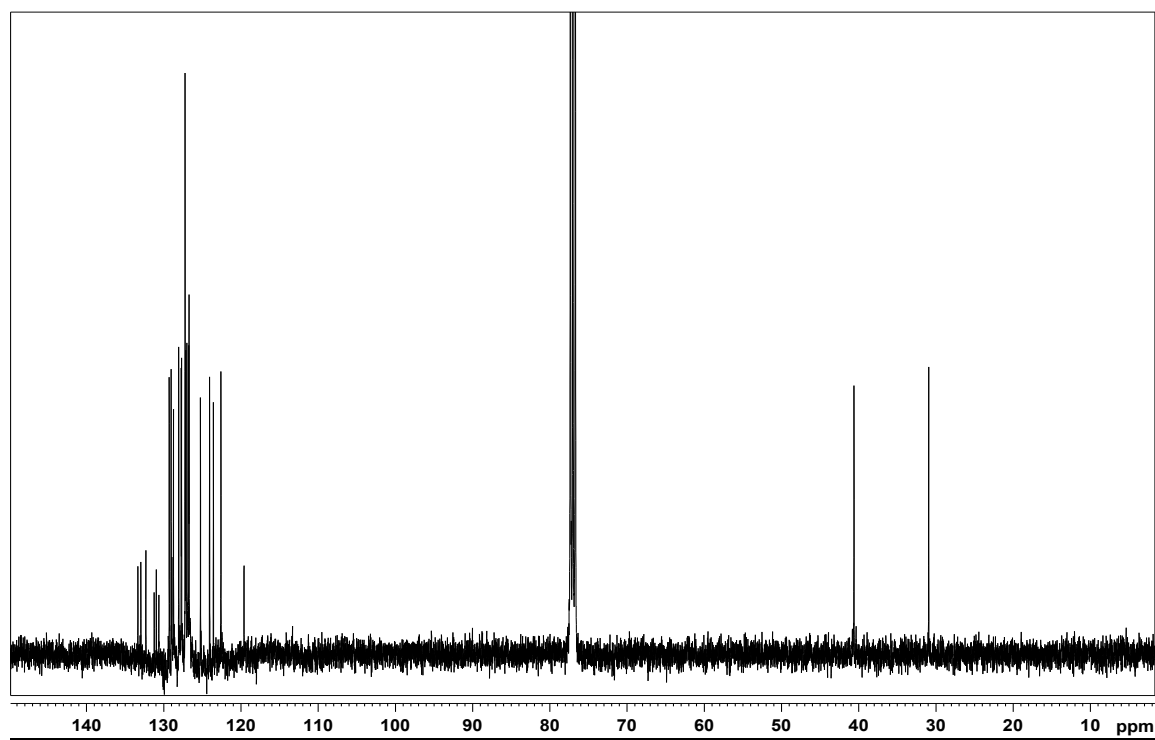

*1-(9-phenanthryl)-2-naphthylacetonitrile(4f)*

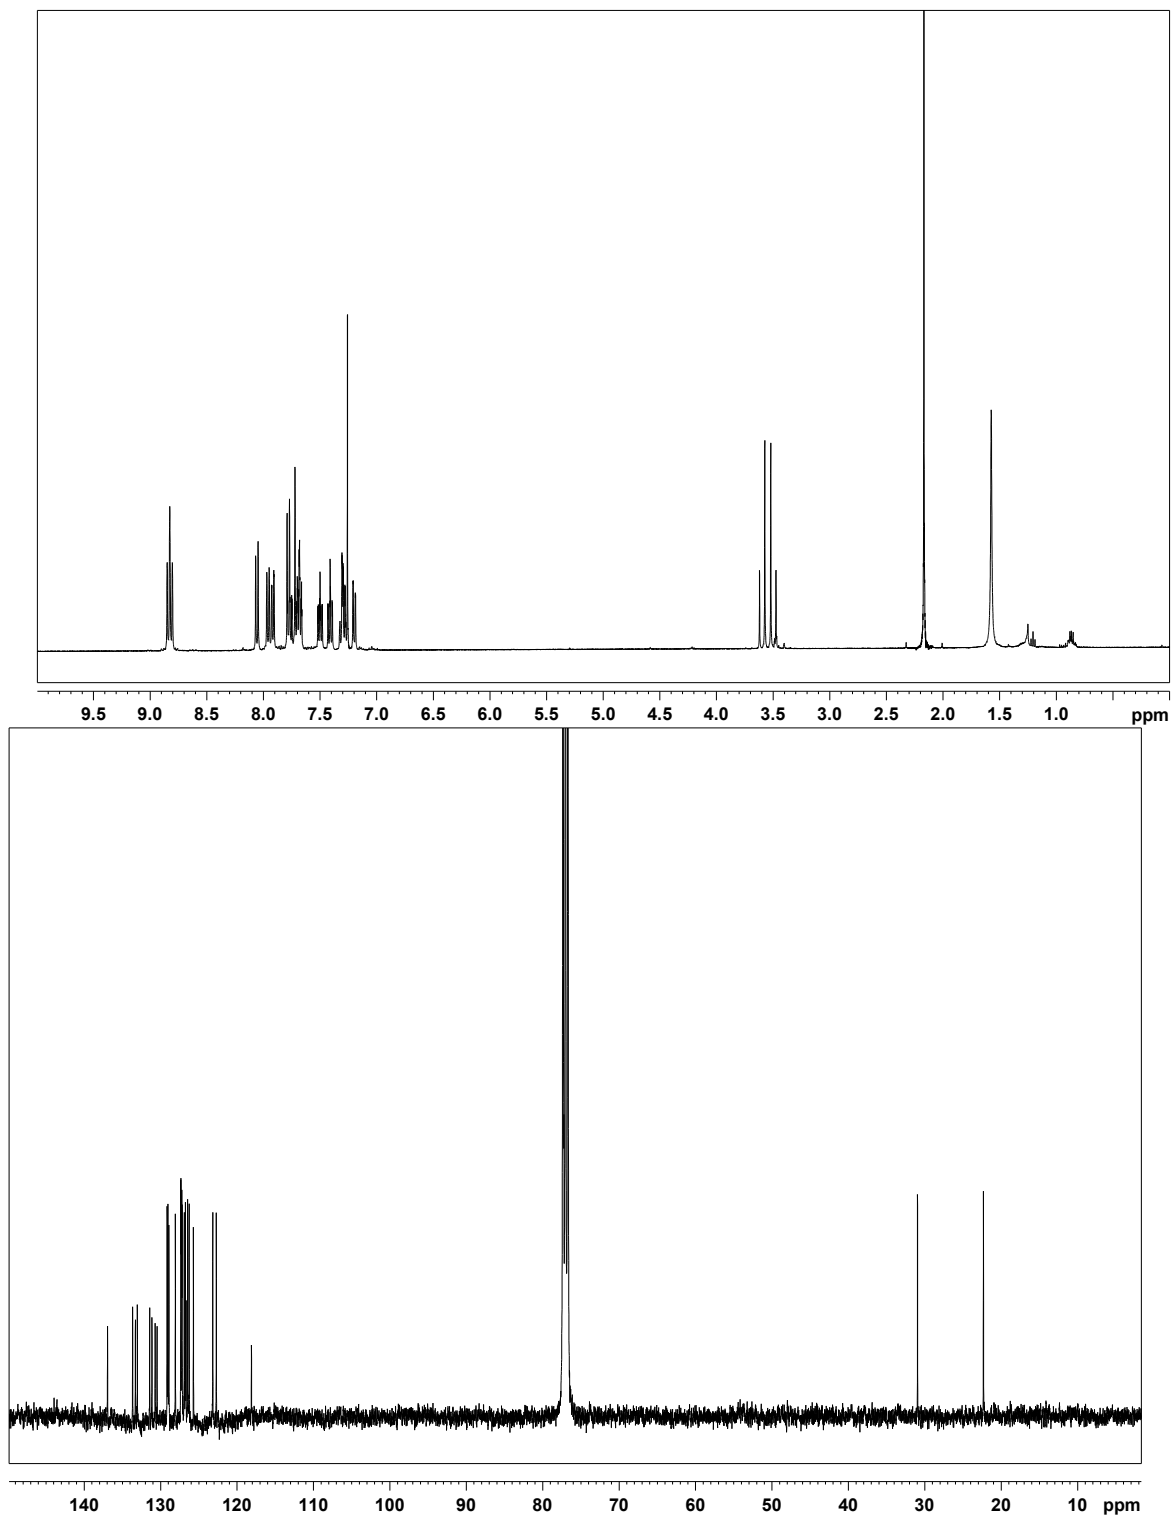

*$\alpha$ -(4-cyanophenyl)-2-naphthylacetonitrile(3g)*

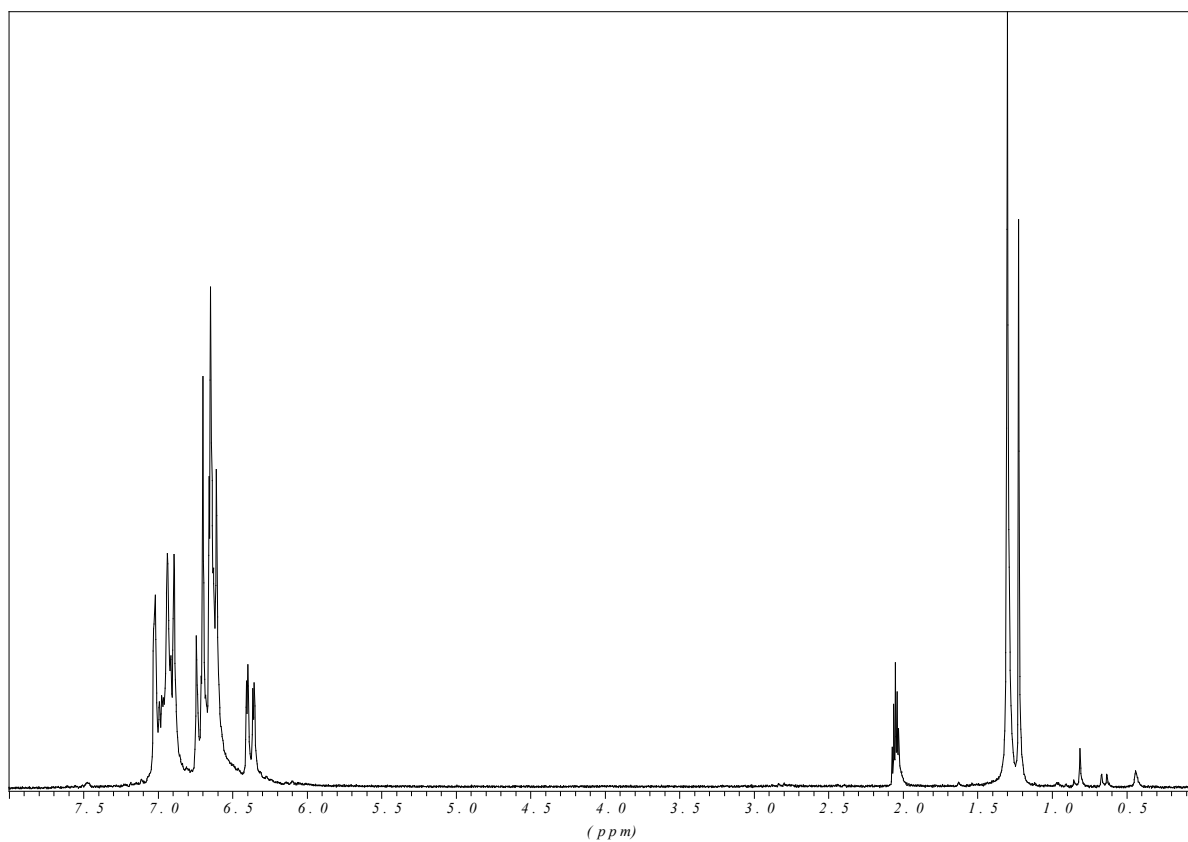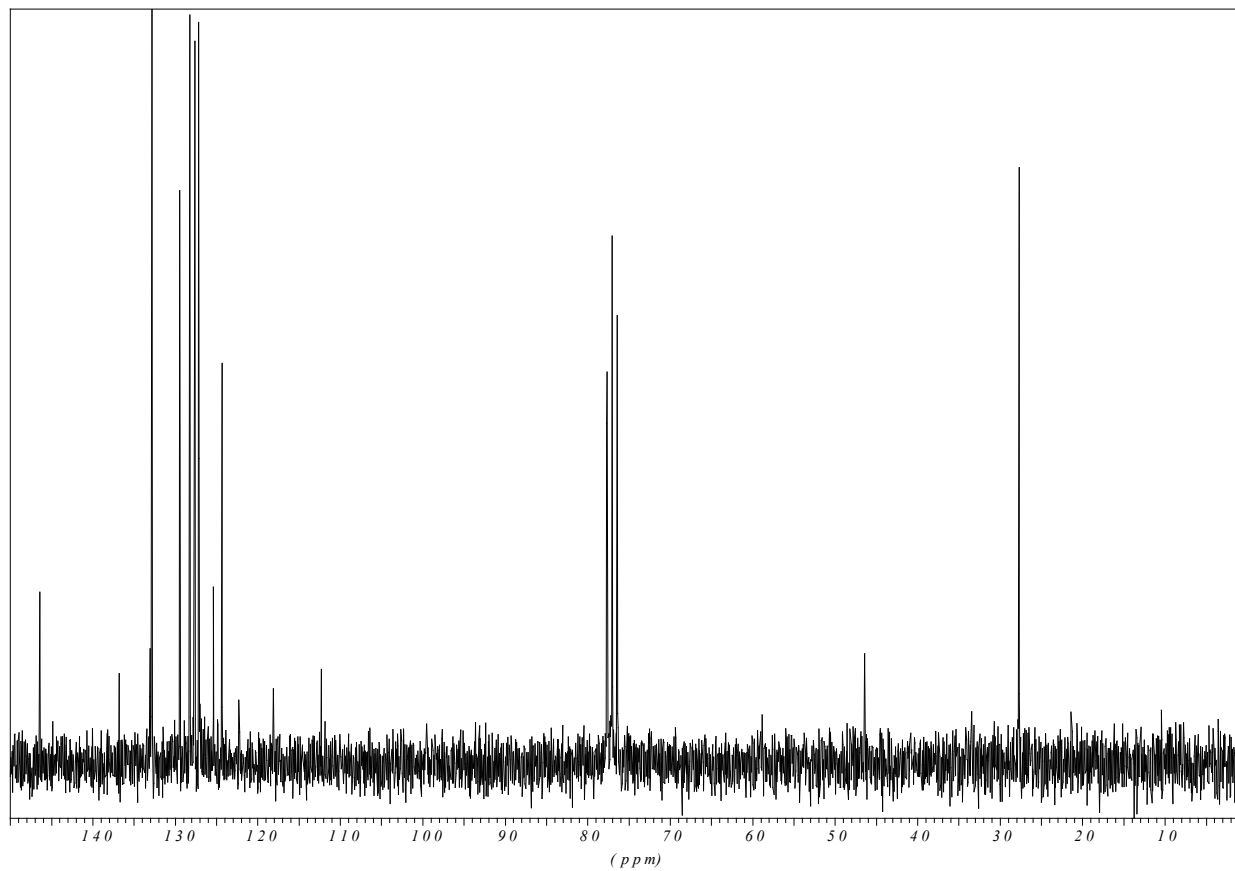

Supplement: c1nj20699k.pdf [file c1nj20699k.pdf]
